# Supplementary material
Source: Springer Nature journal article supplement (https://www.springermedizin.de/resource/supplementary/12936_2004_117_MOESM1_ESM.pdf/9546924)

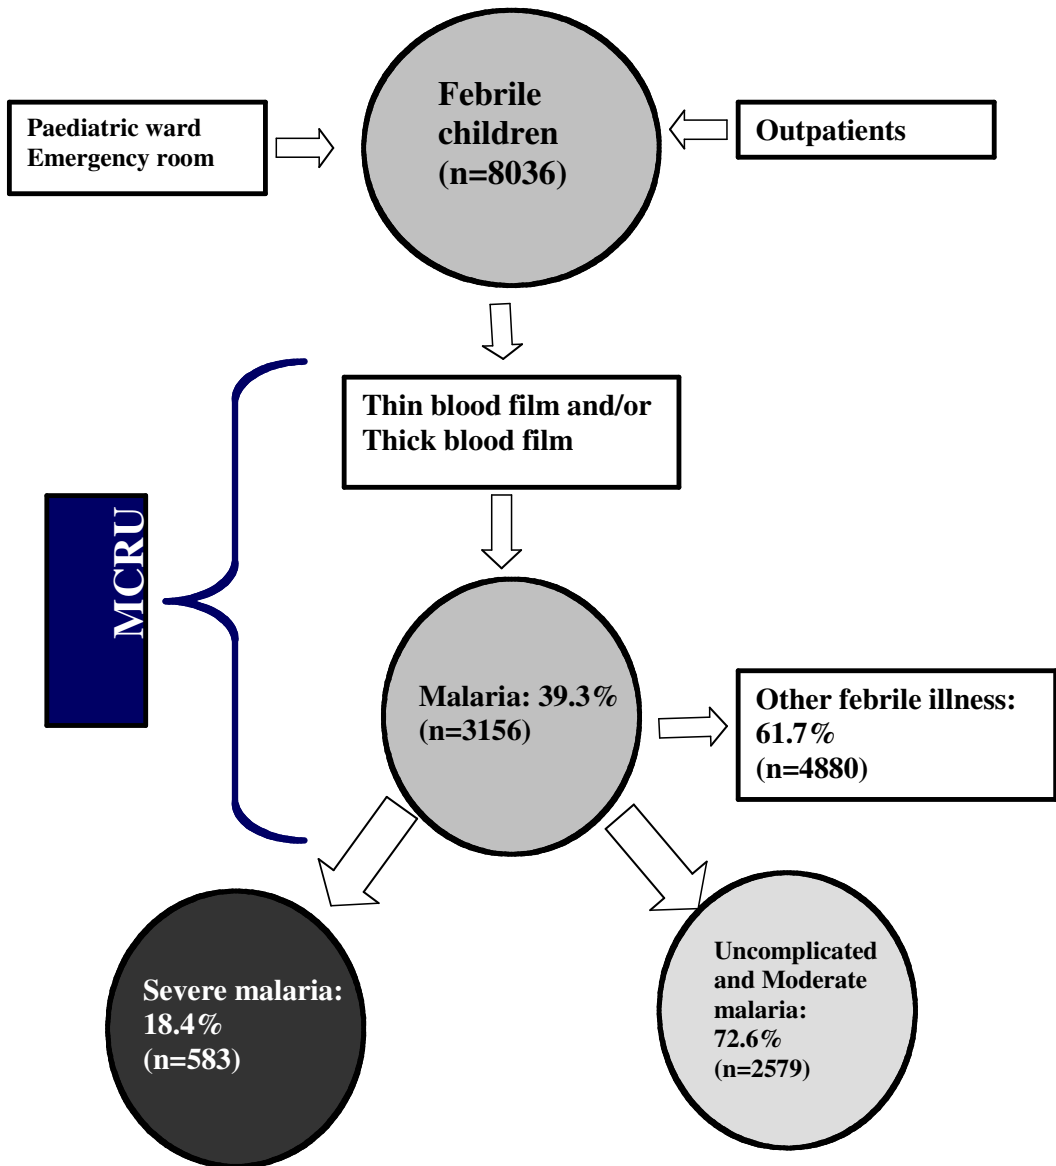

Supplement: MOESM1 [file 9546924]
